# Supplementary material for: A new dual stainless steel cryogenic trap for efficient separation of krypton from argon and xenon
Source: Royal Society of Chemistry journal article supplement (doi:10.1039/d0ja00052c), 2020-01-01

## **Supporting Information**

### **A new dual stainless steel cryogenic trap for efficient separation of krypton from argon and xenon**

Sandrine Péron<sup>1\*</sup>, Sujoy Mukhopadhyay<sup>1</sup> and Michael Huh<sup>1</sup>

<sup>1</sup>Department of Earth and Planetary Sciences, University of California - Davis, Davis, California  
95616, USA

\*corresponding author: [scperon@ucdavis.edu](mailto:scperon@ucdavis.edu)

Figure S1. Schematic of the dual stainless steel cryogenic trap.

Page 2

**Figure S1.** Schematic of the dual stainless steel cryogenic trap fabricated by Janis Research Company, complementary to Figure 1. The design is considered proprietary by Janis Research, therefore the full schematic is not shown.

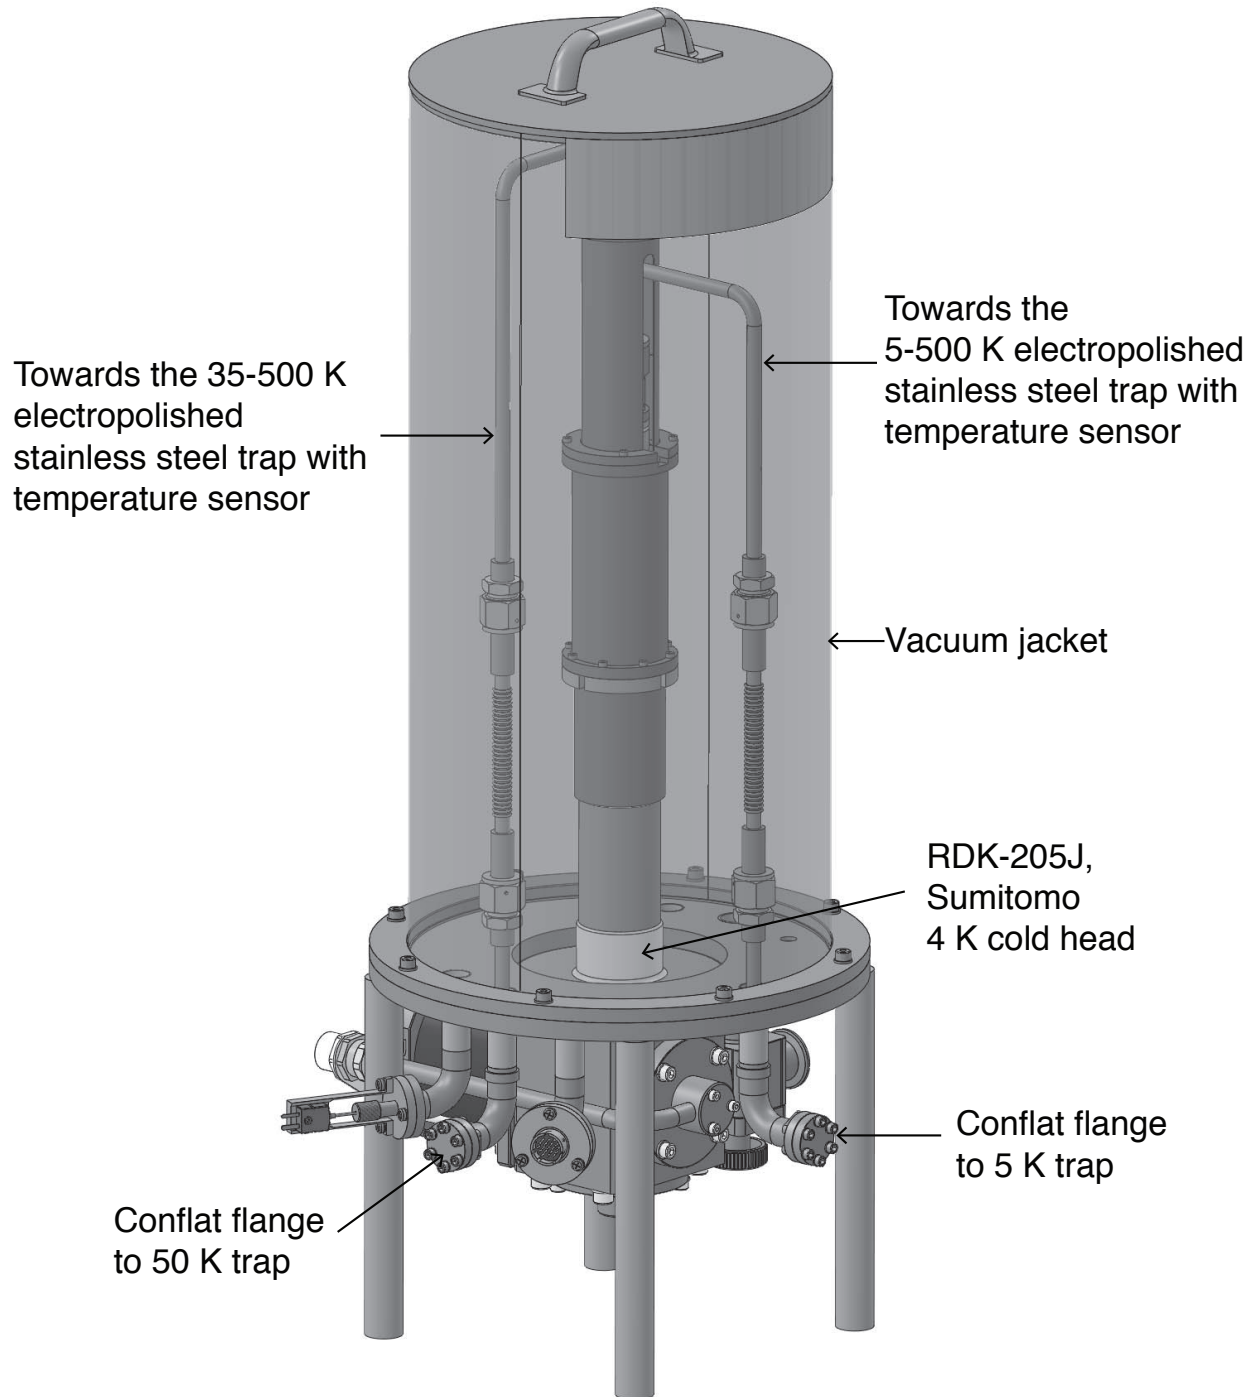

Supplement: d0ja00052c1.pdf [file d0ja00052c1.pdf]
